# Supplementary material
Source: PubMed Central journal article supplement (PMC7880408)
Supplement: jci-131-130746-s006.pdf [file jci-131-130746-s006.pdf]

**Table S1. List of experiments in which each tissue sample was used and observed GAS growth on the relevant tissue sample**

| Sample <sup>A</sup> | Figure                                                                                 | GAS multiplication observed by live imaging | GAS multiplication observed in static conditions | GAS multiplication observed in supernatant |
|---------------------|----------------------------------------------------------------------------------------|---------------------------------------------|--------------------------------------------------|--------------------------------------------|
| S#16                | Fig. 1A, Fig. 1H, Fig. 2A-C, Fig. S2, Fig. S3C                                         | YES                                         | YES                                              | nt <sup>C</sup>                            |
| S#20                | Fig. 1B Fig. S3B                                                                       | na <sup>B</sup>                             | na                                               | nt                                         |
| S#1                 | Fig.S2A                                                                                | na                                          | na                                               | nt                                         |
| S#9                 | Fig. 1C-D, Fig. 1G-J, Fig. 2B-D, Fig. 4B-C, Fig. S2, Fig. S4, Table S3-6, Supp video 1 | YES                                         | YES                                              | YES                                        |
| S#10                | Fig. 1D, Fig. 1H-J, Fig. 4B-C, Fig. S4, Table S3-6                                     | YES                                         | na                                               | YES                                        |
| S#7                 | Fig. 1H-J, Fig. 3C, Fig. 4B-C, Fig. S4, Table S3-6                                     | YES                                         | na                                               | NO                                         |
| S#17                | Fig. 1H, Fig. 3D, Fig. 3G                                                              | YES                                         | na                                               | nt                                         |
| S#8                 | Fig. 1I-J, Fig. 2B-C, Fig. 4B-C, Fig. S2, Fig. S4, Table S3-6                          | na                                          | YES                                              | NO                                         |
| S#5                 | Fig. 1D, Fig.2E, Fig. 3E, Fig. S3B                                                     | YES                                         | na                                               | nt                                         |
| S#18                | Fig. 1D-F, Supp video 2                                                                | YES                                         | na                                               | nt                                         |
| S#19                | Fig. 1D, Fig. 3A, Supp video 3                                                         | YES                                         | na                                               | nt                                         |
| S#2                 | Fig. 1I, Fig. 2B, Fig. 3B, Fig. 4A, Fig. S2, Table S2                                  | na                                          | YES                                              | YES                                        |
| S#3                 | Fig. 1I, Fig. 4A, Table S2                                                             | na                                          | na                                               | YES                                        |
| S#4                 | Fig. 1I, Fig. 4A, Table S2                                                             | na                                          | na                                               | YES                                        |
| S#6                 | Fig. 1I, Fig. 4A, Table S2                                                             | na                                          | na                                               | NO                                         |
| S#12                | Fig. 3G                                                                                | na                                          | na                                               | nt                                         |
| S#13                | Fig. 3E                                                                                | na                                          | na                                               | nt                                         |
| S#14                | Fig. 3E                                                                                | na                                          | na                                               | nt                                         |
| S#15                | Fig. 3G, Fig. S2                                                                       | na                                          | YES                                              | nt                                         |
| S#21                | Fig. 3G                                                                                | na                                          | na                                               | nt                                         |

<sup>A</sup> Samples with different numbers are from different subjects. The numbering does not correspond to the order in which subjects were included in the study.

<sup>B</sup> NA, not applicable. The sample had either not been analyzed by live imaging or not been observed at two time points.

<sup>C</sup> NT, not tested

**Table S2. Comparison of the overexpression of genes involved in the immune response**

|              | GAS              |                  | GBS              |                  |
|--------------|------------------|------------------|------------------|------------------|
|              | mRNA Fold-change | <i>p</i> -value  | mRNA Fold-change | <i>p</i> -value  |
| IL6          | 3.44             | 0.2443517        | 20.08            | 0.0000001        |
| <b>IL1B</b>  | <b>6.06</b>      | <b>0.0101306</b> | <b>7.79</b>      | <b>0.0000004</b> |
| <b>TNF</b>   | <b>40.37</b>     | <b>0.0106377</b> | <b>32.25</b>     | <b>0.0000016</b> |
| <b>CXCL2</b> | <b>29.34</b>     | <b>0.0005470</b> | <b>10.46</b>     | <b>0.0000044</b> |
| <b>CCL20</b> | <b>12.77</b>     | <b>0.0005246</b> | <b>33.91</b>     | <b>0.0000144</b> |
| CXCL8        | 1.90             | 0.0911197        | 4.80             | 0.0000319        |
| IL1RN        | 0.94             | 0.9482826        | 3.96             | 0.0000747        |
| <b>CCL4</b>  | <b>111.43</b>    | <b>0.0032225</b> | <b>12.69</b>     | <b>0.0000815</b> |
| IL1A         | 1.83             | 0.4538192        | 6.85             | 0.0001290        |
| NFKB1        | 1.11             | 0.6764782        | 2.25             | 0.0001450        |
| ICAM1        | 2.08             | 0.4791674        | 5.01             | 0.0001730        |
| NFKBIA       | 2.75             | 0.0500612        | 5.51             | 0.0001780        |
| <b>CXCL3</b> | <b>28.34</b>     | <b>0.0000184</b> | <b>9.92</b>      | <b>0.0001850</b> |
| TLR2         | 1.26             | 0.7816158        | 4.52             | 0.0002380        |
| TLR6         | 1.15             | 0.7529346        | 0.43             | 0.0017900        |
| CCL13        | 0.76             | 0.7698270        | 0.47             | 0.0018400        |
| NLRP3        | 2.36             | 0.0521823        | 4.39             | 0.0022200        |
| CCR7         | 2.62             | 0.1155378        | 3.36             | 0.0064500        |
| CCR1         | 2.00             | 0.0623347        | 0.36             | 0.0065000        |
| <b>CCL3</b>  | <b>14.52</b>     | <b>0.0009604</b> | <b>4.88</b>      | <b>0.0072300</b> |
| CD80         | 1.61             | 0.5656690        | 3.08             | 0.0081700        |
| CD14         | 0.53             | 0.5807491        | 0.64             | 0.0084000        |
| IFNA2        | 0.84             | 0.8758766        | 0.71             | 0.0125000        |
| CCL2         | 2.58             | 0.2099790        | 2.38             | 0.0137000        |
| CCL8         | 1.71             | 0.5478146        | 3.10             | 0.0146000        |
| IL10RA       | 0.56             | 0.2238125        | 1.55             | 0.0186000        |
| <b>CXCL1</b> | <b>14.52</b>     | <b>0.0007640</b> | <b>3.20</b>      | <b>0.0200000</b> |
| TICAM1       | 0.87             | 0.7283693        | 1.69             | 0.0226000        |
| <b>IL23A</b> | <b>9.47</b>      | <b>0.0229023</b> | <b>13.52</b>     | <b>0.0229000</b> |
| CXCL5        | 1.48             | 0.5061415        | 2.98             | 0.0233000        |
| IL37         | 0.64             | 0.1534900        | 0.68             | 0.0356000        |
| CD40LG       | 2.38             | 0.3139426        | 0.74             | 0.0411000        |
| IL18         | 1.19             | 0.7368512        | 2.15             | 0.0510000        |
| LTA          | 0.35             | 0.2617627        | 1.42             | 0.0511000        |
| TLR8         | 0.94             | 0.9689146        | 1.72             | 0.0609000        |
| CXCR2        | 0.51             | 0.3713690        | 0.54             | 0.0629000        |
| NOD1         | 0.78             | 0.5487833        | 0.60             | 0.0639000        |
| CXCR3        | 1.58             | 0.4743766        | 0.77             | 0.0803000        |
| IL9R         | 0.23             | 0.1263553        | 1.27             | 0.0815000        |
| IRAK1        | 0.69             | 0.3244791        | 0.74             | 0.0861000        |
| TLR4         | 1.40             | 0.4818540        | 0.63             | 0.0879000        |
| TBX21        | 1.09             | 0.9344079        | 0.75             | 0.0966000        |
| RAG1         | 0.74             | 0.5642718        | 0.80             | 0.1000000        |
| CSF2         | 1.18             | 0.8418437        | 1.33             | 0.1030000        |
| IFNGR1       | 0.74             | 0.3574953        | 1.25             | 0.1120000        |
| STAT3        | 1.21             | 0.4820490        | 1.27             | 0.1330000        |
| CXCL10       | 3.57             | 0.4609962        | 5.21             | 0.1360000        |
| TLR1         | 0.93             | 0.9379901        | 0.70             | 0.1380000        |
| CASP1        | 0.76             | 0.7458079        | 1.42             | 0.1440000        |
| CD86         | 0.94             | 0.9553241        | 0.64             | 0.1730000        |
| <b>IL10</b>  | <b>4.73</b>      | <b>0.0490744</b> | <b>1.43</b>      | <b>0.2190000</b> |

The mean value of the fold change is that calculated from the data shown Figure 4A for GAS (n=4) published in Park et al (1) for GBS (n=4). In green and bold the genes significantly upregulated after infection with GAS and GBS compared to non-infected samples; in orange the genes significantly only upregulated after infection with GBS. In red and bold, the gene only upregulated after GAS infection. Hits were classified in the decreasing order of *p*-value for GBS, until no gene was significantly differentially regulated for GAS and GBS.

**Table S3. Concentration of inflammatory molecules in the supernatants at 4 h**

|       | <b>CT</b>                  | <b>WT</b>                  | <b>ΔSLO</b>               | <b>ΔSpeB</b>              |
|-------|----------------------------|----------------------------|---------------------------|---------------------------|
| TNF   | <b>1.9</b> (0.25-2.9 ±0.6) | <b>130</b> (31-287 ±60.8)  | <b>23</b> (3.7-70 ±15.8)  | <b>58</b> (6.9-161 ±35)   |
| CCL3  | <b>11</b> (3.9-16 ±2.9)    | <b>186</b> (40-481 ±102)   | <b>31</b> (8-92 ±20)      | <b>82</b> (18-250 ±56)    |
| CXCL2 | <b>323</b> (81-444 ±84)    | <b>544</b> (158-1091 ±222) | <b>167</b> (42-441 ±92)   | <b>340</b> (132-629 ±104) |
| CCL20 | <b>13</b> (2-21 ±4)        | <b>9.6</b> (2.2-23 ±4.6)   | <b>3.5</b> (1.6-7.1 ±1.3) | <b>8.2</b> (5.1-11 ±1.2)  |
| IL-1β | <b>3.7</b> (2.8-4.9 ±0.44) | <b>11</b> (5.2-25 ±4.5)    | <b>9.7</b> (2.6-18 ±3.3)  | <b>18</b> (5.7-39 ±7.4)   |
| IL-6  | <b>267</b> (60-417 ±75)    | <b>346</b> (46-778 ±159)   | <b>106</b> (21-145 ±29)   | <b>279</b> (107-393 ±68)  |

Concentration in pg/mL. Results are expressed as: Mean (minimum-maximum ± standard error). 4 samples.

**Table S4. Concentration of inflammatory molecules in the supernatants at 8 h**

|              | <b>CT</b>                       | <b>WT</b>                       | <b><math>\Delta</math>SLO</b>    | <b><math>\Delta</math>SpeB</b>    |
|--------------|---------------------------------|---------------------------------|----------------------------------|-----------------------------------|
| TNF          | <b>1.5</b> (0.1-2.8 $\pm$ 0.6)  | <b>401</b> (17-1090 $\pm$ 246)  | <b>320</b> (83-622 $\pm$ 118)    | <b>938</b> (152-1798 $\pm$ 372)   |
| CCL3         | <b>12</b> (5.4-19 $\pm$ 2.8)    | <b>616</b> (18-1908 $\pm$ 437)  | <b>503</b> (73-761 $\pm$ 158)    | <b>1202</b> (279-2192 $\pm$ 391)  |
| CXCL2        | <b>576</b> (291-1077 $\pm$ 172) | <b>932</b> (153-2311 $\pm$ 482) | <b>1115</b> (487-2115 $\pm$ 351) | <b>3078</b> (410-7190 $\pm$ 1453) |
| CCL20        | <b>24</b> (5-55 $\pm$ 11)       | <b>33</b> (1.6-85 $\pm$ 18)     | <b>33</b> (3.1-79 $\pm$ 17)      | <b>147</b> (13-429 $\pm$ 98)      |
| IL-1 $\beta$ | <b>3.9</b> (1.6-6.9 $\pm$ 1.2)  | <b>43</b> (19-69 $\pm$ 10)      | <b>49</b> (15-97 $\pm$ 18)       | <b>75</b> (27-154 $\pm$ 29)       |
| IL-6         | <b>602</b> (448-904 $\pm$ 102)  | <b>951</b> (222-2203 $\pm$ 432) | <b>1202</b> (495-2127 $\pm$ 401) | <b>2274</b> (359-4283 $\pm$ 853)  |

Concentration in pg/mL. Results are expressed as: Mean (minimum-maximum  $\pm$  standard error). 4 samples.

**Table S5. Concentration of antimicrobial peptides in the supernatants at 4 h**

|      | <b>CT</b>                     | <b>WT</b>                      | <b>ΔSLO</b>                     | <b>ΔSpeB</b>                  |
|------|-------------------------------|--------------------------------|---------------------------------|-------------------------------|
| hBD1 | <b>2212</b> (313-3369 ± 661)  | <b>2807</b> (379-6579 ± 1324)  | <b>934</b> (69-1378 ± 305)      | <b>2923</b> (1045-3848 ± 636) |
| hBD2 | <b>4599</b> (2376-6405 ± 885) | <b>5356</b> (1862-8029 ± 1423) | <b>6288</b> (1862-11719 ± 2049) | <b>963</b> (301-1773 ± 304)   |
| LL37 | <b>1.1</b> (0.36-2.1 ± 0.51)  | <b>1.3</b> (0.61-2.2 ± 0.38)   | <b>1.2</b> (0.31-2.7 ± 0.54)    | <b>2.2</b> (0.71-5 ± 0.97)    |

Concentration in pg/mL. Results are expressed as: Mean (minimum-maximum ± standard error). 4 samples

**Table S6. Concentration of antimicrobial peptides in the supernatants at 8 h**

|      | <b>CT</b>                        | <b>WT</b>                         | <b>ΔSLO</b>                       | <b>ΔSpeB</b>                      |
|------|----------------------------------|-----------------------------------|-----------------------------------|-----------------------------------|
| hBD1 | <b>4365</b> (2888-5561 ± 552)    | <b>5072</b> (1677-7020 ± 1169)    | <b>11102</b> (6402-12948 ± 1571)  | <b>8998</b> (5193-13317 ± 2207)   |
| hBD2 | <b>15146</b> (7426-29730 ± 5162) | <b>39634</b> (9835-89457 ± 39634) | <b>13077</b> (3527-32273 ± 13077) | <b>25009</b> (7706-52619 ± 10216) |
| LL37 | <b>1.6</b> (0.56-3.2 ± 0.62)     | <b>1.8</b> (0.26-4.3 ± 0.89)      | <b>1.7</b> (0.49-3.2 ± 0.68)      | <b>2.3</b> (0.91-3.2 ± 0.49)      |

Concentration in pg/mL. Results are expressed as: Mean (minimum-maximum ± standard error). 4 samples

**Table S7. Strains and plasmids used in this study**

| <b>Strains or plasmid</b>     | <b>Relevant properties</b>                                                                                                                                                            | <b>Source or reference</b> |
|-------------------------------|---------------------------------------------------------------------------------------------------------------------------------------------------------------------------------------|----------------------------|
| <i>Streptococcus pyogenes</i> |                                                                                                                                                                                       |                            |
| M28PF1                        | Wild-type representative <i>emm28</i> clinical isolate                                                                                                                                | (2)                        |
| ΔSpeB                         | M28PF1 deleted from nt 72 to nt 1155 of the <i>speB</i> gene coding for SpeB                                                                                                          | This study                 |
| ΔSLO                          | M28PF1 deleted from nt 76 to nt 1690 of the <i>slo</i> gene coding for SLO                                                                                                            | This study                 |
| BTSLO                         | Back-to-the-wild-type, the reverting strain of the ΔSLO construction                                                                                                                  | This study                 |
| M28PF1-GFP                    | M28PF1 with the integrated pG1-lacA-PTetO-gfp                                                                                                                                         | This study                 |
| ΔSpeB-GFP                     | ΔSpeB with the integrated pG1-lacA-PTetO-gfp                                                                                                                                          | This study                 |
| Plasmids                      |                                                                                                                                                                                       |                            |
| pG+host5                      | Erm; ColE1 replicon, thermosensitive derivative of pGK12; MCS pBluescript                                                                                                             | (3)                        |
| pATΩgfp                       | pAT28 derivative containing the <i>gfp</i> gene                                                                                                                                       | (4)                        |
| pTCV_TetO                     | Plasmid containing the tetO tetR Pxyl promoter, inducible with anhydrotetracycline                                                                                                    | (5)                        |
| pG1-Perm-gfp                  | pG+host5 containing the <i>gfp</i> gene from pATΩgfp                                                                                                                                  | This study                 |
| pG1-lacA-Perm-gfp             | pG1-Perm-gfp with the lacA intergenic region to allow stable integration in GAS genome                                                                                                | This study                 |
| pG1-lacA-PTetO-gfp            | pG1-lacA-Perm-gfp with the Erm promoter replaced by the tetO tetR Pxyl promoter of pTCV_TetO. Can be integrated in GAS genome for anhydrotetracycline inducible <i>gfp</i> expression | This study                 |

**Table S8. Primers used in this study for cloning and checking cloning**

| Primer Name | Sequence                                                                                                                     | Orientation, Localization / gene start codon |
|-------------|------------------------------------------------------------------------------------------------------------------------------|----------------------------------------------|
| F_tetO      | GTGGAATTGTGAGCGGATAAC                                                                                                        | NA                                           |
| R_tetO      | <b>GGTACCTTTT</b> CACTCGTTAAAAAGTTT <b>GAGAATATTTTATATTT</b><br>TGTT <b>CATGTAATCACTCCTTCTTAATCTGTTAACGCTACGATCTAG</b><br>CT | NA                                           |
| F_lacA      | <b>ACATGATTACGAATT</b> TCAACGACTTCGTATTTACCTT                                                                                | Reverse, 92 nt                               |
| R_lacA      | <b>ACACTCTTAAGAATTC</b> GCGGTCATATCTGAGATGTT                                                                                 | Direct, 551 nt                               |
| R_extlacA   | CCACCATGGGTCCTGATA                                                                                                           | Direct, 609 nt                               |
| RP48        | AGCGGATAACAATTTACACAGGA                                                                                                      | NA                                           |
| SLO-F1      | <b>GACTCTAGAGGATCC</b> GGTGCCAAAGGGTTTAGAA                                                                                   | Direct, 492 nt                               |
| SLO-R1      | <b>CTCAGGGG</b> GATAAGAGCTGCCGTTAGTAG                                                                                        | Reverse 75 nt                                |
| SLO-F2      | <b>TCTTATC</b> CCCTGAGCCCATATGGTTCGAT                                                                                        | Direct, 1690 nt                              |
| SLO-R2      | <b>CATGATTACGAATTC</b> GGGACAGTTGGGGTCAAATC                                                                                  | Reverse 2179 nt                              |
| SpeB-F1     | <b>GACTCTAGAGGATCC</b> GAGCATCTACTAGCCACAATA                                                                                 | Direct, 531 nt                               |
| SpeB-R1     | GGGTTAGCAAGAACAAATCC                                                                                                         | Reverse, 71 nt                               |
| SpeB-F2     | <b>TGTTCTTGCTAACCC</b> TTCAACGGTTACCAAAGTGC                                                                                  | Direct, 1155 nt                              |
| SpeB-R2     | <b>CATGATTACGAATTC</b> ATTAGTAGGCGTTGATGACC                                                                                  | Reverse, 1676 nt                             |

\* restriction enzyme sites are highlighted in bold and sequences used for the In-fusion© cloning are shown in red.



### References of supplementary tables:

1. Park H-R et al. Group B *Streptococcus* activates transcriptomic pathways related to premature birth in human extraplacental membranes *in vitro*. *Biol Reprod*. 2018;98(3):396–407
2. Longo M et al. Complete Genome Sequence of *Streptococcus pyogenes emm28* strain M28PF1, responsible of a puerperal fever. *Genome Announc*. 2015;3(4):e00750-15.
3. Biswas I, Gruss A, Ehrlich SD, Maguin E. High-efficiency gene inactivation and replacement system for gram-positive bacteria. *J Bacteriol*. 1993;175(11):3628–3635.
4. Clarebout G, Leclercq R. Fluorescence assay for studying the ability of macrolides to induce production of ribosomal methylase. *Antimicrob Agents Chemother*. 2002;46(7):2269–2272.
5. Buscetta M et al. FbsC, a novel fibrinogen-binding protein, promotes *Streptococcus agalactiae*-host cell interactions. *J Biol Chem*. 2014;289(30):21003–21015.

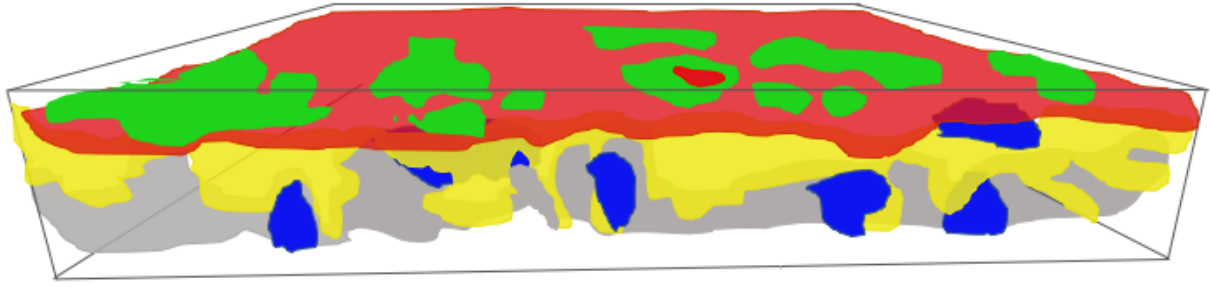

**Figure S1. Schematic reproduction of the Imaris 3D representation in Figure 1A.** The border of the cells could not be precisely delineated by this approach that did not label their surface. The volume they occupy is grossly indicated. Green, GAS; red, fibronectin, yellow, collagen; blue, nuclei; grey, cellular layer.

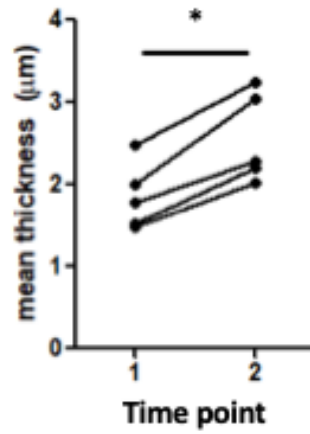

**Figure S2. GAS grows *ex vivo* on decidual tissues in static conditions.** Decidual tissues were infected and images taken at 2 time points. Mean thickness was evaluated as in figure 1H; mean values of 5 to 7 fields for each time point. Statistical analysis: Mann-Whitney U test, one-way; \*,  $p < 0.05$ .

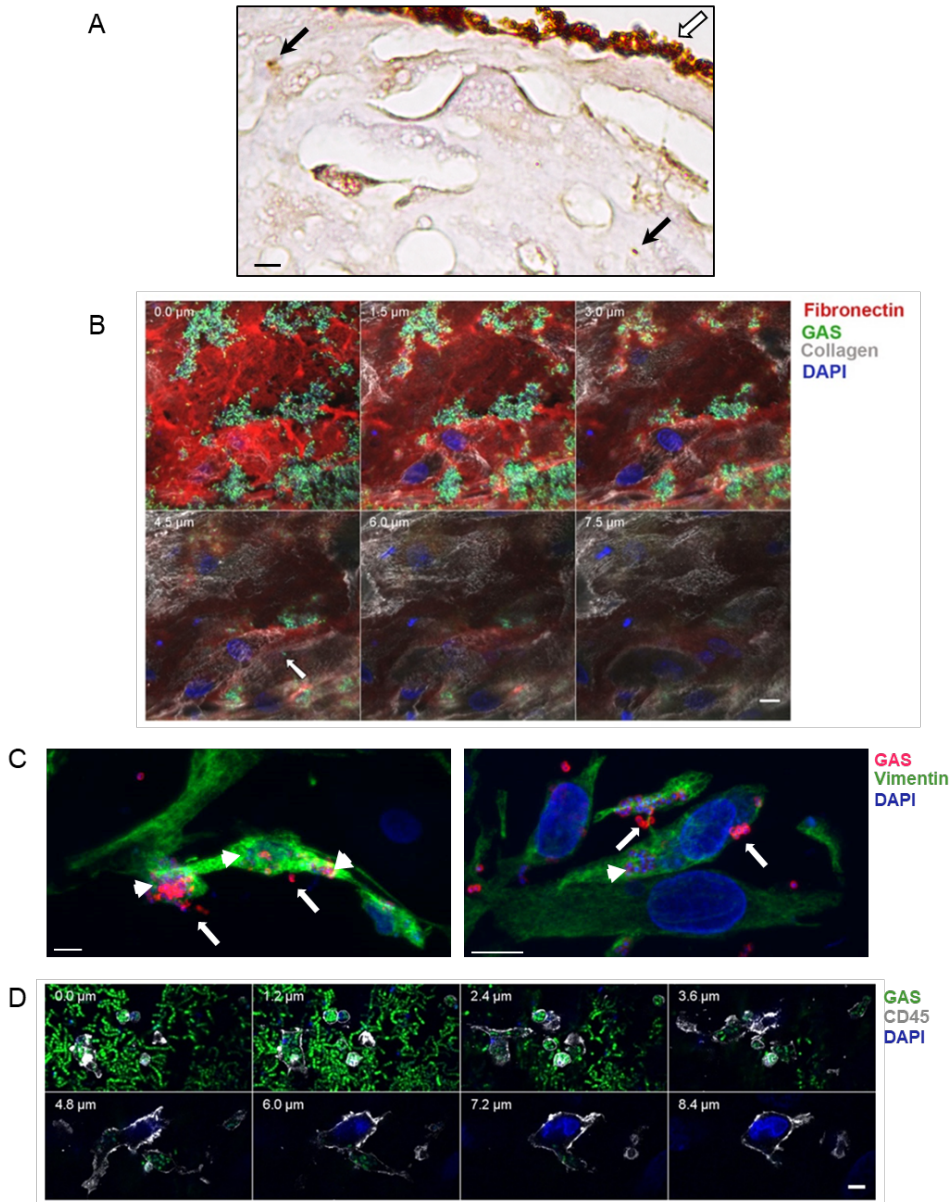

**Figure S3. GAS invades the tissue and is found as extra- or intracellular bacteria, in stromal and immune cells.** **A**, Immunohistochemical staining of GAS on the decidua 4h pi static conditions. White arrow, colonies at the surface of the tissue; black arrows tissue invading bacteria. Anti-GAS antibodies were used and secondary antibodies were detected with DAB as a chromogen (brown deposits correspond to signal) Scale: 10  $\mu$ m. Magnification: 100 X. **B**, ImageJ montage of an infected tissue at 16 h pi static conditions. Anti-fibronectin, red; anti-type IV collagen, grey; GFP-WT, green; DAPI, blue; white arrow, a GFP-WT coccus, the 4.5 is the same slice as that shown Figure 2A. Scale bar: 10  $\mu$ m. Magnification: 40 X. **C**, Immunofluorescence of the decidua 16 h pi static conditions. Stromal cells are vimentin +; vimentin, green; GAS, detected by anti-GAS antibodies, magenta; DAPI, blue; white arrows, bacteria in direct contact with stromal cells; arrowheads bacteria inside stromal cells. Scale bar 10  $\mu$ m. Magnification: 100 X., **D**, ImageJ montage of an infected tissue 3 h pi flow conditions. The 4.8 m is the same slice as that shown Figure 2E. Anti-CD45, grey; GFP-WT, green; DAPI, blue. Scale bar: 5  $\mu$ m. Magnification: 100 X. **B & D**, each corresponds to a single field at multiple depths. The depths are indicated at the top left of each panel. 0 corresponds to the first appearance of the GAS layer and is the first slice shown. All images are single slices acquired with a z-step of 0.3  $\mu$ m.

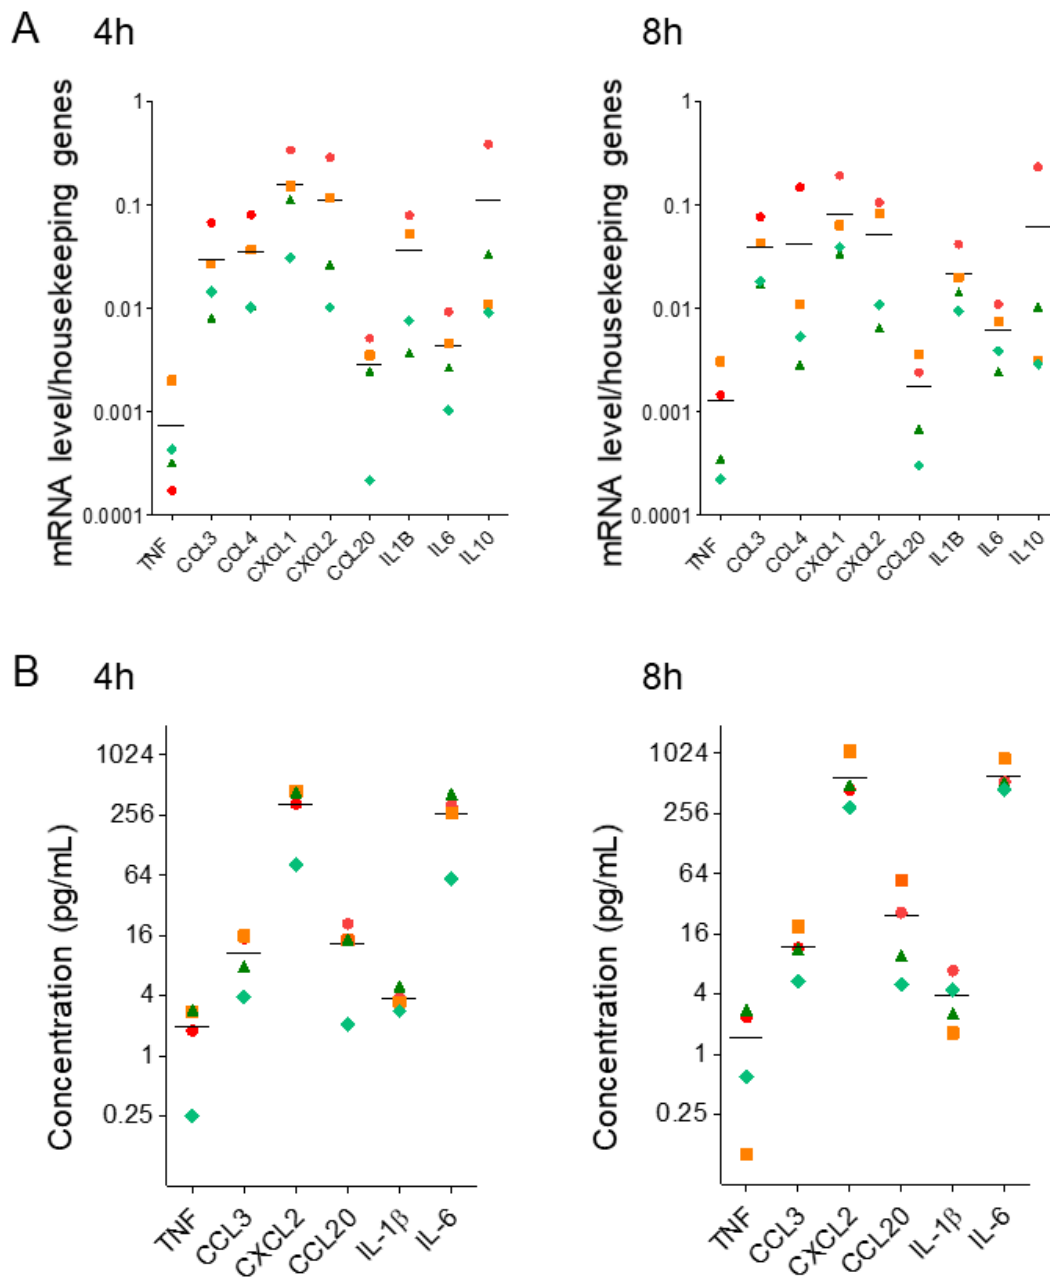

**Figure S4. Basal levels expression of cytokine genes (A) and accumulation of the cytokines in non-infected tissues (B).** A, Basal level of expression of the indicated immune-related genes in the non-infected conditions, at 4 (left panel) and 8 h (right panel) post-experiment starting point, compared to the housekeeping genes. B. Basal levels of accumulation of the indicated cytokine peptide 4 h (left panels) and 8 h (right panels) in the supernatant of non-infected decidual tissues. Symbols as in Figure 5B.

## **Supplementary video:**

### **Supp video 1. GAS multiplication at the tissue surface**

Live confocal microscopy of the human decidua infected by GAS under flow conditions, acquired *en face*. GAS is in green. Magnification: 25 X. Scale bar: 20  $\mu\text{m}$ . Time step = 30 minutes. The images are the same as in Figure 1C and are a z-max intensity projection.

### **Supp video 2. Isolated GAS multiplication at the tissue surface**

Live confocal microscopy GAS is in green of the human decidua infected by GAS under flow conditions, acquired *en face*. Magnification: 25 X. Scale bar: 5  $\mu\text{m}$ . Time step = 30 minutes. The images are the same as in Figure 1E and are a z-max intensity projection..

### **Supp video 3. Immune cell blebbing and death after infection**

Live confocal microscopy of tissue infected under flow conditions. Intact nucleus, red (Draq5); permeabilized nucleus (dead cell), blue; CD45 (immune cells), yellow. Magnification: 25 X. Scale bar: 10  $\mu\text{m}$ . Time step = 30 minutes. The images are a z-max intensity projection.
